# Supplementary material
Source: Springer Nature journal article supplement (https://www.springermedizin.de/resource/supplementary/13012_2012_560_MOESM8_ESM.pdf/9629998)
Supplement: MOESM8 [file 9629998]

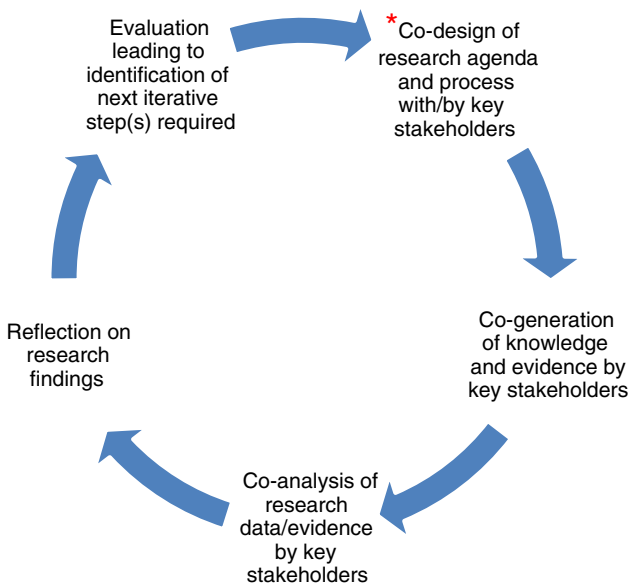

\* = initial starting point, which stakeholders may re-visit and continue on from in iterative cycles of research, analysis, reflection and evaluation.
